# Supplementary material for: In-depth genomic data analyses revealed complex transcriptional and epigenetic dysregulations of BRAF V600E in melanoma
Source: Springer Nature journal article supplement (doi:10.1186/s12943-015-0328-y), 2015-03-13

A

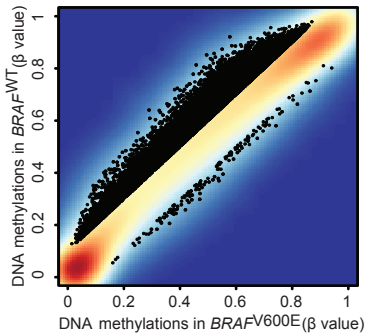

B

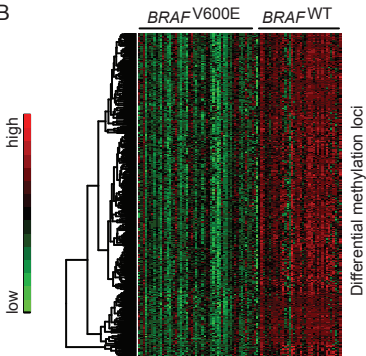

Supplement: MOESM3 [file 9763002]
